# Supplementary material
Source: MDPI journal article supplement (https://www.mdpi.com/2073-4395/11/8/1664)
Supplement: s1 [file s1]

Supplementary Materials:

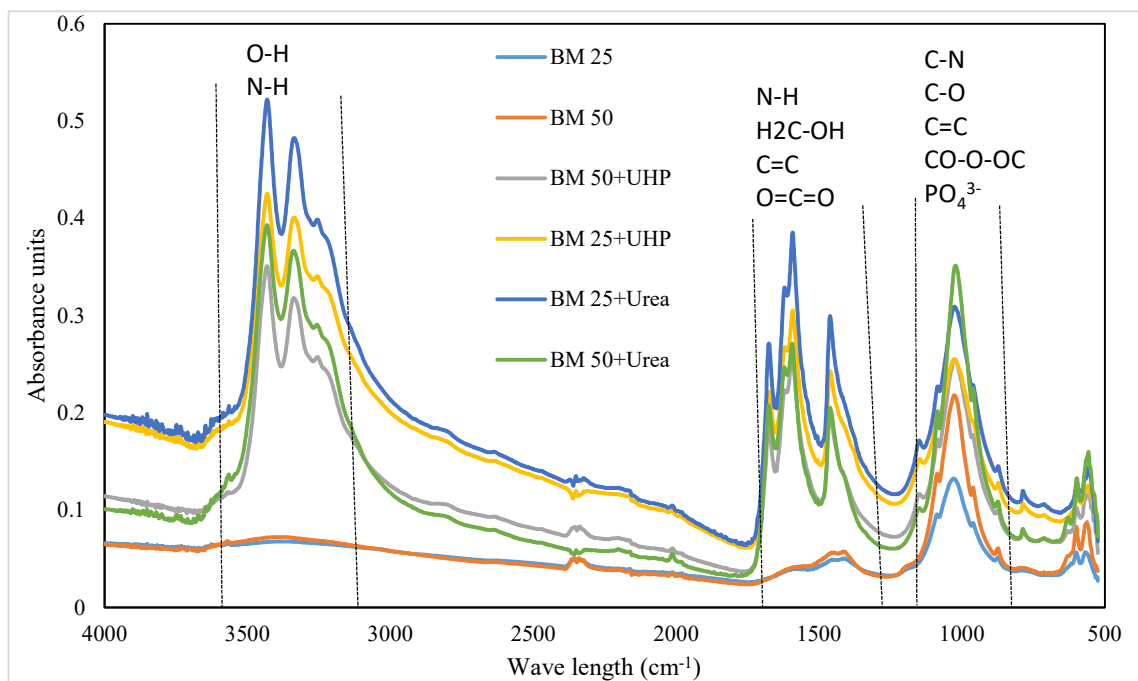

**Figure S1.** Fourier transform infrared spectrum of the BM biochars and their corresponding NEBs.

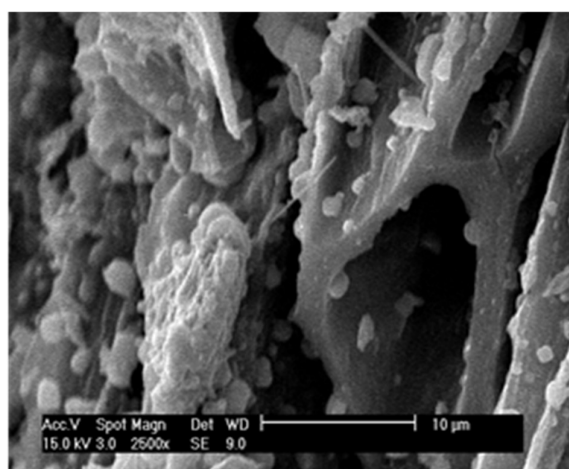

(a)

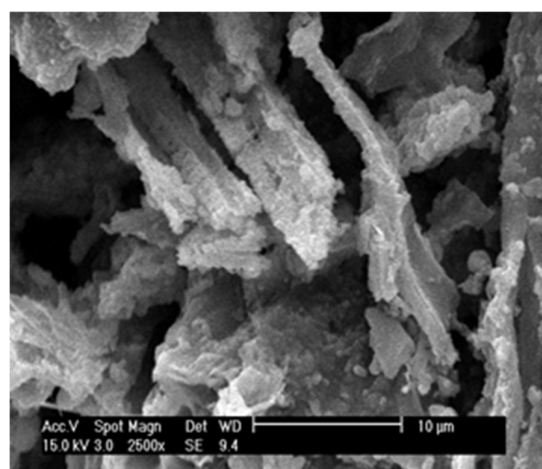

(b)

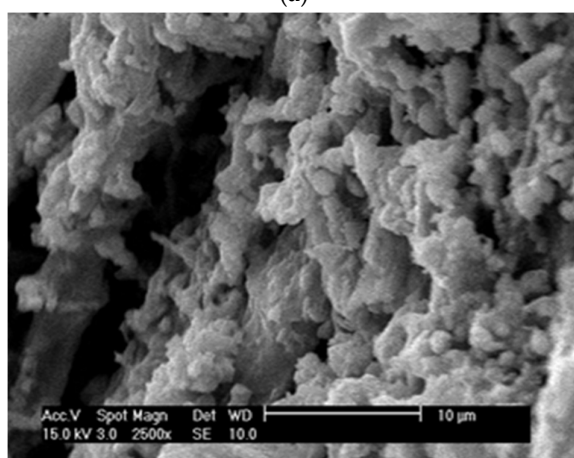

(c)

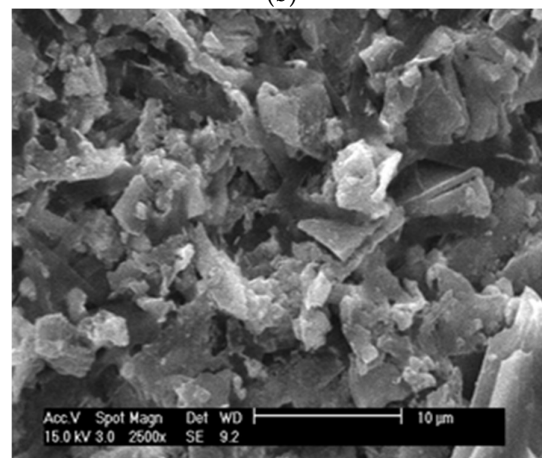

(d)

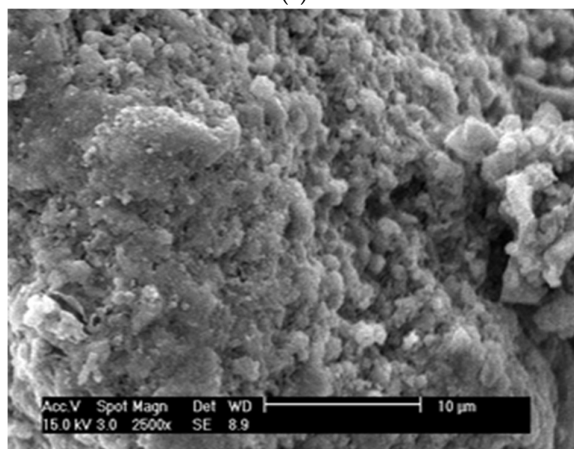

(e)

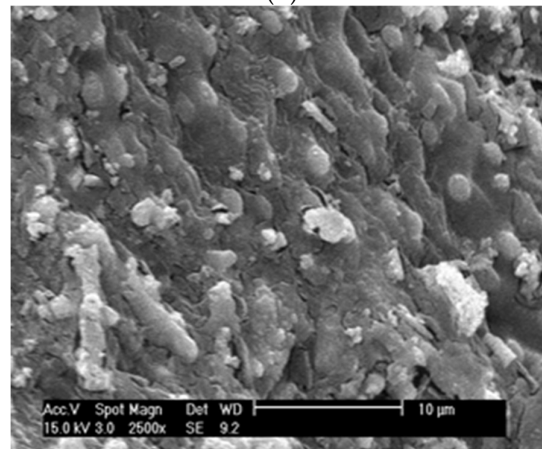

(f)

**Figure S2.** Scanning electron microscope images for (a) BM 25, (b) BM 50, (c) BM 25+UHP, (d) BM 50+UHP, (e) BM 25+Urea and (f) BM 50+Urea.
